# Supplementary material for: Prevalence of pressure injury on the medical wards of public general hospitals in Kuwait: a national cross-sectional study
Source: Springer Nature journal article supplement (doi:10.1186/s12913-024-10615-x), 2024-02-07

# Data Collection Form for Prevalence Rate of Pressure Injury

Please fill in this form for every patient with pressure injury

dr.hossam.elamir@gmail.com [Switch account](#)

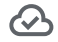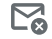

Not shared

\* Indicates required question

Hospital name \*

Your answer

Ward number \*

Your answer

Patient's file number \*

Your answer

Sex \*

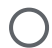

Male

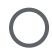

Female

Patient age in years \*

Your answer

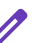

Patient weight in kg \*

Your answer

Patient height in cm \*

Your answer

Date of current admission \*

Date

mm/dd/yyyy

Mobility condition/Activity \*

- Mobile
- Immobile
- Mobile with assistant

Patient has \*

Select all that apply

- Chronic disease
- Spinal cord injury
- Immobility/Reduced mobility
- Vasopressor infusion
- Sepsis
- Dehydration
- Other:

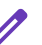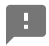

Date of pressure injury onset \*

Date

mm/dd/yyyy

Pressure injury is \*

- Hospital-acquired
- Community-acquired
- Hospital and community-acquired

Location/s of pressure injury \*

Select all that apply

- Sacrum
- Buttocks
- Heels
- Back
- Back of head
- Elbows
- Other:

Number of pressure injuries \*

Your answer

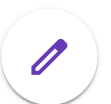

Worst-stage pressure injury \*

- Stage 1
- Stage 2
- Stage 3
- Stage 4
- Suspected deep tissue injury

Is pressure injury related to medical devices? \*

- Yes
- No

Preventive Measurement Taken \*

Select all that apply

- Pressure injury assessment on admission
- Reassess risk for all patients daily
- Inspect skin of at-risk patients daily
- Manage moisture
- Optimise nutrition/hydration
- Pressure-reducing surfaces
- Repositioning depends on their condition
- Using air mattress
- Other:

Braden scale assessment score documented? \*

- Yes
- No

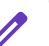

Braden scale assessment score \*

Your answer

Submit

Clear form

Never submit passwords through Google Forms.

This content is neither created nor endorsed by Google. [Report Abuse](#) - [Terms of Service](#) - [Privacy Policy](#).

Google Forms

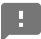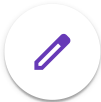

Supplement: MOESM1 [file 26710684]
